# Supplementary material
Source: Research Square preprint supplement (doi:10.21203/rs.3.rs-9233760/v1)
Supplement: Supplementary file 1 [file 16cab344b037bcad9ccf1457.docx]

**Table 1. Baseline clinical characteristics and infection profiles of the cohort**

| **Variable** | **CVID-ID(-)**  n(%)=51 (60 %) | **CVID-ID(+)**  n(%)=34 (40%) | p |
| --- | --- | --- | --- |
| **Gender** Female (n, %) | 23 (45.1%) | 18(52.9%) | 0.478* |
| **Age (years)** Mean (±SD) | 41.22 ± 13.22 | 37.62 ± 11.57 | 0.200** |
| **Age at symptom onset (years)** Median (IQR) | 18.96 (12-30) | 12.00 (7.75-18.25) | 0.080*** |
| **Age at diagnosis (years)** Mean ± SD | 29.78 ± 13.55 | 29.82 ± 12.60 | 0.973** |
| **Delay in diagnosis (years)**  Median (IQR) | 7(4-12) | 10 (7-15.25) | **0.029***** |
| **Annual clinically significant treatment-requiring infection frequency (n/year)**  Median (IQR)  Min-max | 5 (4-7 )  2-16 | 0(0-4)  0-8 | **<0.001***** |
| **Infection Phenotypes** (n, %)  Patients with clinically significant treatment-requiring infections  Patients with minor symptomatic mucosal/URTI events | 47 (92.2%)  22 (43.1%) | 16 (47.1%)  23 (67.6%) | **<0.001**  **0.027** |  |  |  |

**Abbreviations:** CVID, common variable immunodeficiency; CVID-ID(-), CVID without immune dysregulation; CVID-ID(+), CVID with immune dysregu**lation**; SD, standard deviation; IQR, interquartile range; URTI, upper respiratory tract infection.

* Pearson χ² test, ** independent-samples t test, *** Mann–Whitney U test

**Note**: Percentages are presented within each study group. Clinically significant infections reflected severe, persistent, or treatment-requiring infectious episodes based on the infection-related components of the adult ESID warning signs, whereas minor symptomatic mucosal/URTI events were recorded separately. These descriptive categories could overlap within the same patient.
