# Supplementary material
Source: Research Square preprint supplement (doi:10.21203/rs.3.rs-9233760/v1)
Supplement: Supplementary file 2 [file 7a9397d1ef7f8222613d2820.docx]

**Table 3.** Predictors of Immune Dysregulation in CVID: Univariate and Multivariable Logistic Regression

|  | **Univariate Analysis** | | | **Multivariable Analysis** | | |
| --- | --- | --- | --- | --- | --- | --- |
| **Predictor** | **OR** | **95 % CI** | **p** | **OR** | **95 % CI** | **p** |
| **SMBC** (%) | 0.560 | 0.389-0.807 | **0.002** | 0.557 | 0.353–0.881 | **0.012** |
| **CD4⁺ T-cell (%)** | 0.916 | 0.875-0.958 | **<0.001** | 0.923 | 0.880–0.967 | **0.001** |
| **Serum IgA** (mg/dL) | 0.251 | 0.085-0.739 | **0.012** | 0.272 | 0.091–0.818 | **0.020** |

**Note: Nagelkerke** R²=0.566; **Hosmer–Lemeshow goodness-of-fit test,** χ²=3.199, df=7, p=0.866 Overall classification accuracy: 77.6%.

**Abbreviations:** CVID, common variable immunodeficiency; SMBC, switched memory B cells; IgA, immunoglobulin A; OR, odds ratio; CI, confidence interval
