# Supplementary material
Source: Research Square preprint supplement (doi:10.21203/rs.3.rs-9233760/v1)
Supplement: Supplementary file 3 [file dbfcab5d8de39d3b4454f944.docx]

**Table 2.** Comparison of Immunological Parameters Between CVID-ID(-) and CVID-ID(+) Groups.

| **Variable** | **CVID-ID(-)** | **CVID-ID(+)** | **p** |
| --- | --- | --- | --- |
| **IgG (mg/dL)**  Median (IQR) | 293 (140-450) | 446 (179-540) | 0.061* |
| **IgM (mg/dL)**  Median (IQR) | 28 (18-55) | 32 (17-54) | 0.986* |
| **IgA (mg/dL)**  Median (IQR) | 30 (20-120) | 20 (6-37) | **0.008*** |
| **IgE (IU/mL)**  Median (IQR) | 17.00 (5.00-18.50) | 15.07 (7.52-18.47) | 0.672* |
| **CD19+ B cells (%)**  Median (IQR) | 8.00 (6.00-14.00) | 2.55 (0.87-10.25) | **0.005*** |
| **CD19+CD27+IgD – SMBC (%)**  Median (IQR) | 1.9(0.40-5.20) | 0.45 (0.00-1.12) | **0.001*** |
| **CD3+ T cells (%)**  Median (IQR) | 77(70-85) | 78.5(68.25-88.25) | 0.887* |
| **CD3+ CD4+ T cells (%)**  Median (IQR**)** | 35(28.75-45) | 25(15-30) | **<0.001*** |
| **CD3+CD8+ T cells (%)**  Median (IQR) | 39(32-53.25) | 39.5(31.75-56) | 0.814* |
| **CD3+ CD4+ T/ CD3+CD8+ T cells ratio**  Median (IQR) | 0.85(0.51-1.21) | 0.57(0.37-0.90) | **0.024*** |
| **CD16+/CD56+ NK cells (%)**  Median (IQR) | 7.00 (3.50-14.00) | 7.00 (2.95-13.25) | 0.609* |

**Abbreviations:** CVID, common variable immunodeficiency; CVID-ID(-), CVID without immune dysregulation; CVID-ID(+), CVID with immune dysregulation; SMBC, switched memory B cells; NK, natural killer; IQR, interquartile range.

*Mann–Whitney U test.
